# Supplementary material
Source: publisher site journal article supplement (https://www.dovepress.com/article/476833)
Supplement: Supplementary file 1 [file get_supplementary_file.php]

Table S1 Multiple testing correction

| Exposures | p | FDR |
| --- | --- | --- |
| Apolipoprotein A-I | 0.006 | 0.008333333 |
| LDL-C | 0.008 | 0.016666667 |
| HDL-C | 0.019 | 0.025 |
| Apolipoprotein B | 0.051 | 0.033333333 |
| TC | 0.215 | 0.041666667 |
| TG | 0.872 | 0.05 |

Table S2 MVMR analysis

| id.exposure | exposure | outcome | nsnp | b | se | pval | or | or_lci95 | or_uci95 |
| --- | --- | --- | --- | --- | --- | --- | --- | --- | --- |
| ieu-b-107 | apo A-I | COPD | 126 | -0.005592629 | 0.002101941 | 0.007797911 | 0.994422981 | 0.99033458 | 0.99852826 |
| ieu-b-110 | LDL-C | COPD | 56 | -0.002509614 | 0.002726686 | 0.357369228 | 0.997493533 | 0.992176843 | 1.002838713 |
| ieu-b-111 | TG | COPD | 100 | -0.002978177 | 0.002495837 | 0.232768447 | 0.997026254 | 0.99216087 | 1.001915496 |
